# Supplementary material for: Third trimester phthalate exposure is associated with DNA methylation of growth-related genes in human placenta
Source: PubMed Central journal article supplement (PMC5031987; doi:10.1038/srep33449), 2016-09-22
Supplement: srep33449-s1.pdf [file srep33449-s1.pdf]

## Third trimester phthalate exposure is associated with DNA methylation of growth-related genes in human placenta

Yan Zhao,<sup>1</sup> Jiao Chen,<sup>1</sup> Xiu Wang,<sup>1</sup> Qi Song,<sup>1</sup> Huihui Xu,<sup>2\*</sup> Yunhui Zhang<sup>1\*</sup>

<sup>1</sup>Key Laboratory of Public Health Safety, Ministry of Education, School of Public Health, Fudan University, Shanghai, China

<sup>2</sup> Shanghai Municipal Center for Disease Control & Prevention, Shanghai, China

| Gene        | PCR primer                                                                                                                                               | CpGs position                                     |
|-------------|----------------------------------------------------------------------------------------------------------------------------------------------------------|---------------------------------------------------|
| <i>IGF2</i> | Primer Forward (Bio):<br>ATGAATGAGTATTTTTAGGGAAATTGTT<br><br>Primer Reverse:<br>TCCATATCCCCCCTAAATTAACTTCT<br><br>Sequencing primer:<br>CCTCCCTAACACAAAA | Pos1=2148430<br><br>Pos2=2148479                  |
| <i>AHRR</i> | Primer Forward:<br>GGTAGTTATTTAGTTAAGTTTTTTTTT<br><br>Primer Reverse (Bio):<br>TTCACTCTAAATACTAAAACATTTC<br><br>Sequencing primer:<br>TAAGTTTTTTTTTTGA   | Pos1=420093<br><br>Pos2=420109<br><br>Pos3=420119 |

**Table S1. PCR and Pyrosequencing primers.**

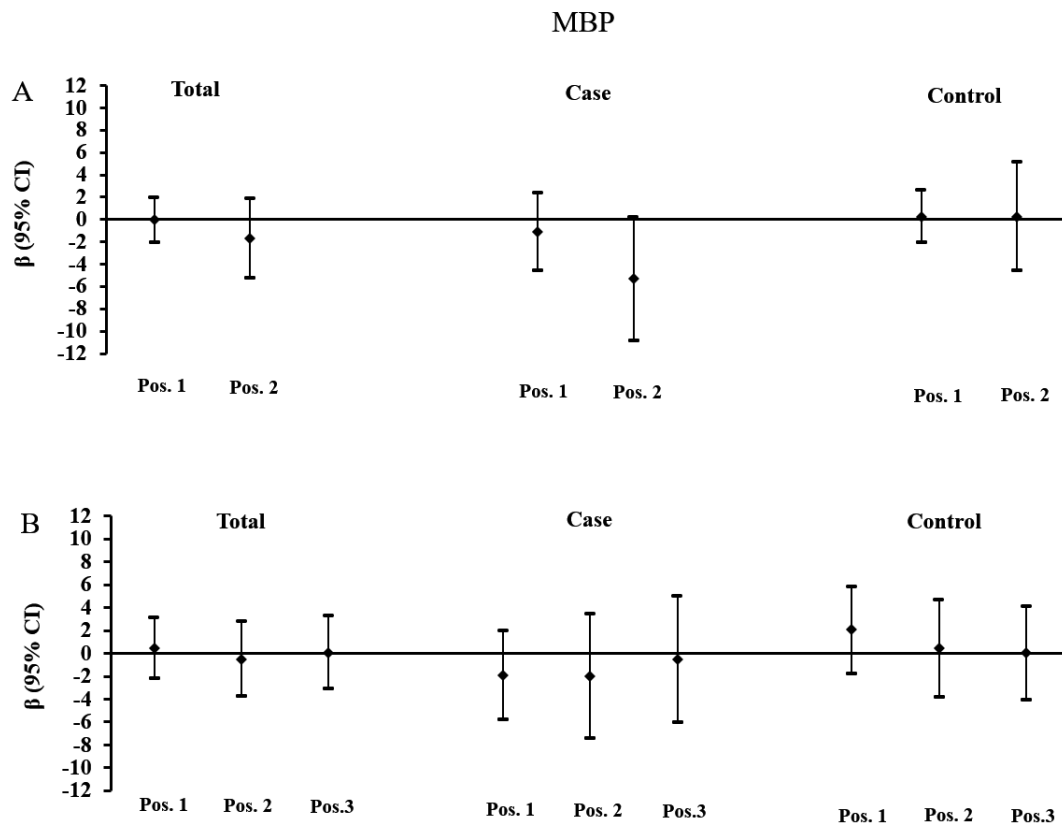

**Figure S1. Associations of maternal urinary concentrations of MBP with placental DNA methylation of *IGF2* and *AHRR*.** (A) Adjusted  $\beta$  and 95% CI for *IGF2* DNA methylation. (B) Adjusted  $\beta$  and 95% CI for *AHRR* DNA methylation. Adjusted for gestational age, ETB, maternal age, delivery type, and infant sex, infection, and other phthalate metabolites.

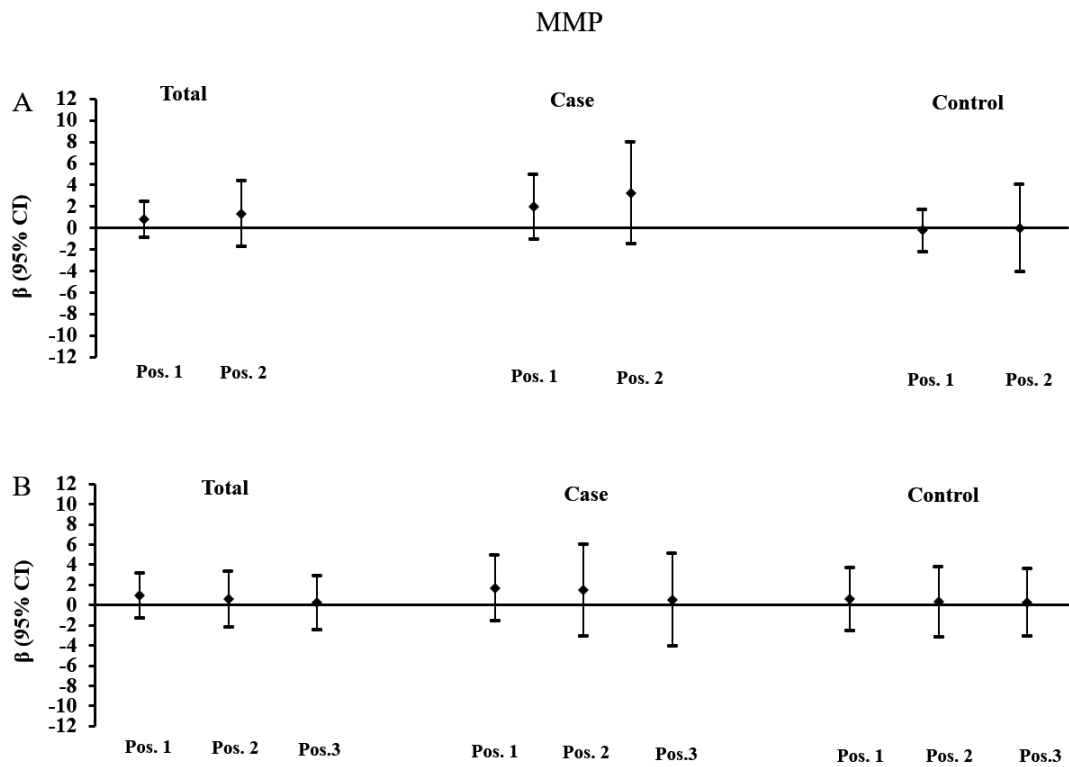

**Figure S2. Associations of maternal urinary concentrations of MMP with placental DNA methylation of *IGF2* and *AHRR*.** (A) Adjusted  $\beta$  and 95% CI for *IGF2* DNA methylation. (B) Adjusted  $\beta$  and 95% CI for *AHRR* DNA methylation. Adjusted for gestational age, ETB, maternal age, delivery type, and infant sex, infection and other phthalate metabolites.
